# Supplementary material
Source: PubMed Central journal article supplement (PMC4906376)
Supplement: mmc1.pdf [file mmc1.pdf]

**Biophysical Journal, Volume 110**

**Supplemental Information**

**Structurally Distinct Cation Channelrhodopsins from Cryptophyte  
Algae**

**Elena G. Govorunova, Oleg A. Sineshchekov, and John L. Spudich**

## Supporting Material

### Structurally distinct cation channelrhodopsins from cryptophyte algae

Elena G. Govorunova, Oleg A. Sineshchekov, and John L. Spudich

Center for Membrane Biology, Department of Biochemistry and Molecular Biology, University of Texas Health Science Center at Houston  
McGovern Medical School, Houston, Texas, USA

Address reprint requests and inquiries to [John.L.Spudich@uth.tmc.edu](mailto:John.L.Spudich@uth.tmc.edu)



**Supporting figure 1.** A phylogenetic tree of 500 closest homologs of the rhodopsin domain of *Guillardia theta* protein model 99928 found in the NCBI non-redundant translated nucleotide database by Position-Specific Iterated BLAST. The hits are color-coded according to the phylogenetic position of their source organisms: orange, cryptophytes; yellow, fungi; olive, other eukaryotes; magenta, haloarchaea; cyan, cyanobacteria; pink, other prokaryotes; not colored, microbial rhodopsins from undefined source organisms. Proteins tested in this study are marked with the black arrows on the right. Some redundant entries have been manually removed by the Dendroscope 3 software (1). The tree was visualized using the EvolView server (2).

### helix 1

### helix 2

*GtCCR1* : I A A N W I S F L V I A G S F V V L C F I S L R Y K G P G G N E N Y Y ----- N G F R E Q N M L T V I I N L W C A L A Y F A K V L Q S H S D D D G F V P ----- : 79  
*GtCCR2* : I T A N W I S F L A I S A S F I I L L V I S L R Y K G P G G T E S F Y ----- N G F K E Q N M L T V F I N L W C A L A Y F A K V L Q S H S N D N G F A P ----- : 79  
*GtCCR3* : I A A D W I G F I A L F G S S L A V A Y K L V T F K G P D Q D D V Y F ----- F G Y R E E K M I S V F V N L F A A L A Y W A K L A S H A N G D V G P A A S ----- : 91  
*PsuCCR* : I I A H W V T F F F H M I T T F Y L G Y V S F H S K G P G G K Q P Y F ----- A G Y H E E N N I G I F V N L F A A I S Y F G K V V S D T H G H N Y Q N V G P F I I G : 102  
*HsBR* : Q I T G R P E W I W L A L G T A L M G L G T L Y F L V K G M G V S D ----- P D A K K F Y A I T T L V P A I A F T M Y L S M L L G Y G L T M V P F G -- G E Q N P : 77  
*HspAR2* : L N D G R P E T L W L G I G T L L M L I G T F Y F I A R G W G V T D ----- K E A R E Y Y A I T I L V P G I A S A A Y L A M F F G I G V T E V E L A S - G T V L D : 88  
*HsoAR3* : L G D G R P E T L W L G I G T L L M L I G T F Y F L V R G W G V T D ----- K D A R E Y Y A V T I L V P G I A S A A Y L S M F F G I G L T E V T V G -- G E M L D : 87  
*HaCR1* : M P E P G S E A I W L W L G T A G M F L G M L Y F I A R G W G E T D ----- S R R Q K F Y I A T I L I T A I A F V N Y L A M A L G F G L T I V E F A -- G E E H P : 78  
*CrChR1* : G S V I C I P N N G Q C F C L A W I K S N G T N A E K L A A N I L Q W I T F A L S A L C L M F Y G Y Q T W K S T C G W E E I Y V A T I E M I K F I I E Y F H E F D E P A V I Y S S N G N K : 154  
*CrChR2* : V N G S V L V P E D Q C Y C A G W I E S R G T N G A Q T A S N V L Q W L A A G F S I L L L M F Y A Y Q T W K S T C G W E E I Y V C A I E M V K V I L E F F F F E F K N P S M L Y L A T G H R : 115  
*PsChR2* : N P E Y L N E T I L L D D C T P I Y L N V G P L W E Q K V A R G T Q W F G V I L S L A F L I Y Y I W I T Y K A T C G W E E L Y V C T I E F C K I V I E L Y F E F S P P A M I Y Q T N G E V : 98  
*MvChR1* : I R Y F V E N D F E G C I P G H F D Q Y S S H G S L H D I V K A A L Y I C M V I S I L Q I L F Y G F Q W R K T C G W E V W F V A C I E T S I Y I I A I T S E A D S P F T L Y L T N G Q I : 134

### helix 3

### helix 4

### helix 5

*GtCCR1* : L T K I P Y L D Y A T T C P L L T L D L M W C L D A P Y K I T S A V L V F T V M I T G V A C S L A V A P ---- Y S F Y W F A M G M V L E I F T Y V L M L S I V R E R L E F I T Q C A H D : 168  
*GtCCR2* : L T V I P Y V D Y C T T C P L L T L D L W C L D A P Y K I S S A V L V F T C L V I A V A C S L A V A P ---- F S Y C W F A M G M V L E T F T Y V F I L S I V R Q R L D F F T L C A R D : 168  
*GtCCR3* : V T T Y K Y L D Y L E T C P L L T I D L W C L N L P Y K F T F G A I V A V C I L C A F M A S V I P P P ---- A R Y M W F G M G I T V E S A A W F N I L K L V R M R L E Q F V S K E A - : 178  
*PsuCCR* : L G N Y R Y A D Y M L T C P L L V M D I L F Q L R A P Y K I T C A M L I F A V L M I G A V T N F Y P G D D M K G P A V A W F C F G C F W Y L I A Y I F M A H I V S K Q Y G R L D Y L A H G : 195  
*HsBR* : I Y W A R Y A D W L E F T P L L L L D I A L L V D A D Q G T I L A L V G A D G I M I G T G L V G A L T ----- K V Y S Y R F V W W A I S T A A M L Y I L Y V L F F G F T S K A E S : 162  
*HspAR2* : I Y Y A R Y A D W L E F T P L L L L D I A L L A K V D R V T I G T L I G V D A L M I V T G L I G A L S ----- K T P L A R Y T W W L F S T I A F L F V I Y L L T S L R S A A K : 173  
*HsoAR3* : I Y Y A R Y A D W L E F T P L L L L D I A L L A K V D R V T I G T L V G V D A L M I V T G L I G A L S ----- H T A I A R Y S W W L F S T I C M I V V L Y F L A T S L R S A A K E : 172  
*HaCR1* : I Y W A R Y S D W L E F T P L L L L Y D I G L L A G A D R N T I T S L V S L D V L M I G T G L V A T L S P G -- S G V L S A G A E R L V W W G I S T A F L L V L L Y F L F S S L S G R V A D : 166  
*CrChR1* : T V W L R Y A E W L L T C P V I L I H L S N L T G L A N D Y N K R T M G L L V S D I G T I V W G T T A A L S K G Y V R V I F F L M G L C Y G I Y T F F N A A K V Y I E A Y H T V P K G I - : 245  
*CrChR2* : V Q W L R Y A E W L L T C P V I L I H L S N L T G L S N D Y S R R T M G L L V S D I G T I V W G A T S A M A T G Y V K V I F F C L G L C Y G A N T F F H A A K A Y I E G Y H T V P K G R - : 206  
*PsChR2* : T P W L R Y A E W L L T C P V I L I H L S N I T G L N D D Y S G R T M S L I T S D I G G I C M A V T S A L S K G W L K W L F F V I G C C Y G A S T F Y H A A L T Y I E S Y Y T M P H G V - : 189  
*MvChR1* : S P Q L R Y M E W L M T C P V I L I A L S N I T G M A E E Y N K R T M T L L T S D V C C I V L G M M S A A S K P R L K G I L Y A V G W A F G A W T Y W T A L Q V Y R D A H K A V P K P -- : 224

### helix 6

### helix 7

*GtCCR1* : S N A K R S I K H L K A A V I I Y F G I W P I F A I L W L L S Y R A A N V I S N D T N H I L H C I I D V I A K S C F G F V L L H F K M Y F D K K L L E S G : 245  
*GtCCR2* : S N A K Q S L K H L K T A V F I Y F G I W L L F P L I W L L S Y R A A N V I S N D I N H I F H C I I D V I A K S V Y G F A L L Y F K M Y F D K K L I E S G : 245  
*GtCCR3* : --- K K V R Q S L K V A C M T Y F F I W L G Y P T L W V L G D A G -- V L D S V S A L L H T F L D V F S K S I Y G F A L L H F V M R T D K R E F I F V : 251  
*PsuCCR* : T K A E G A L F S L K L A I I T F F A I W A F P L V W L L S V G T G - V L S N E A A E I C H C I C D V V A K S V Y G F A L A N F R E Q Y D R E L Y G L L : 271  
*HsBR* : M - R P E V A S T F K V L R N V T V V L W S A Y P V V W L I G S E G A G I V P L N I E T L L F M V L D V S A K V G F G L I L L R S R A I F G E A E A P E P : 238  
*HspAR2* : R - S E E V R S T F N T L T A L V A V L W T A Y P I L W I V G T E G A G V V L G I E T L A F M V L D V T A K V G F G F V L L R S R A I L G E T E A P E P : 249  
*HsoAR3* : R - G P E V A S T F N T L T A L V L V L W T A Y P I L W I I G T E G A G V V L G I E T L L F M V L D V T A K V G F G F I L L R S R A I L G D T E A P E P : 248  
*HaCR1* : L - P S D T R S T F K T L R N L V T V V W L V Y P V W W L I G T E G I G L V G I G I E T A G F M V I D I T A K V G F G I I L L R S H G V L D G A A E T T G : 242  
*CrChR1* : ----- C R D L V R Y L A W L Y F C S W A M F P V L F L L G P E G F G H I N Q F N S A I A H A I L D I A S K N A W S M M G H F L R V K I H E H I L L Y G : 318  
*CrChR2* : ----- C R Q V V T G M A W L F F V S W G M F P I L F I L G P E G F G V L S V Y G S T V G H T I I D I M S K N C W G L L G H Y L R V L I H E H I L I H G : 279  
*PsChR2* : ----- C K N M V L A M A A V F F T S W F M F P G L F L A G P E G T N A L S W A G S T I G H T V A D I L S K N A W C M I G H F L R L E I H K H I I I H G : 262  
*MvChR1* : ----- L A W Y V R A M G Y V F F T S W L T F P G W E L L G P E G L E V V T G T V S T L M H A C S D L I S K N L W G F M D W H L R V L V A R H R K L F : 297

**Supporting figure 2.** A ClustalW partial protein alignment of four cryptophyte CCRs used in this study: *GtCCR1 aka* 120390 (KU761994), *GtCCR2 aka* 99928 (KU761992), *GtCCR3 aka* 162755 (KU761993) and *PsuCCR aka PsChR2* (KF992056). For comparison are also included haloarchaeal proton pumps: *HsBR*, *Halobacterium salinarum* bacteriorhodopsin (V00474), *Halobacterium* sp aus-2 archaeorhodopsin-2 (S56354), *Halorubrum sodomense* archaeorhodopsin-3 (GU045593), *Haloarcula argentinosa* cruxrhodopsin-1 (D31880), and chlorophyte CCRs: *Chlamydomonas reinhardtii* ChR1 (AF508965), *Chlamydomonas reinhardtii* ChR2 (AF508966), *Platymonas (Tetraselmis) subcordiformis* ChR2 (JX983143), and *Mesostigma viride* ChR1 (JF922293). Numbers in parentheses are GenBank accession numbers. Amino acid residue numbering and helical regions are according to the *HsBR* sequence. The Glu residues conserved in helix 2 of chlorophyte CCRs but not found in cryptophyte CCRs or haloarchaeal rhodopsin proton pumps are highlighted green, and the Asp residues conserved in helix 3 of haloarchaeal rhodopsin proton pumps and cryptophyte CCRs are highlighted red.

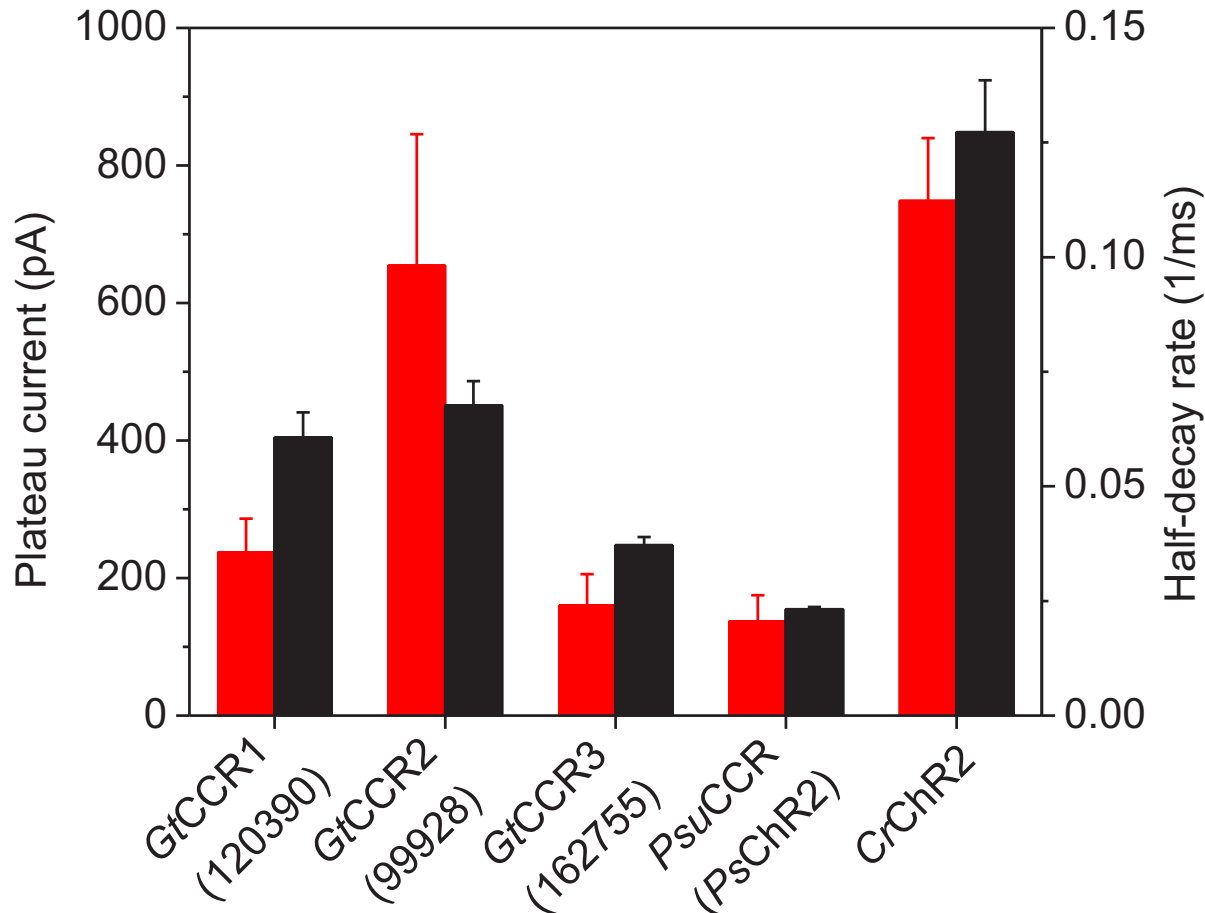

**Supporting figure 3.** The mean amplitudes of stationary photocurrents (red bars, left axis) generated by cryptophyte CCRs in HEK293 cells at the saturating light intensity and the wavelengths of the maximal sensitivity for each protein (see Fig. 2 in the main text), and half-decay rates of these currents upon switching off the light (black bars, right axis). The data are the mean values  $\pm$  SEM ( $n = 5-14$  cells). Although the current amplitudes also reflect expression levels, expression yield was not the reason for the observed differences, because the intensities of the tag fluorescence of all tested constructs were similar. The half-decay rate of the current decay (half-closing of the channel) is the reciprocal of the time when the stationary photocurrent amplitude decreases 50% after switching off the light.

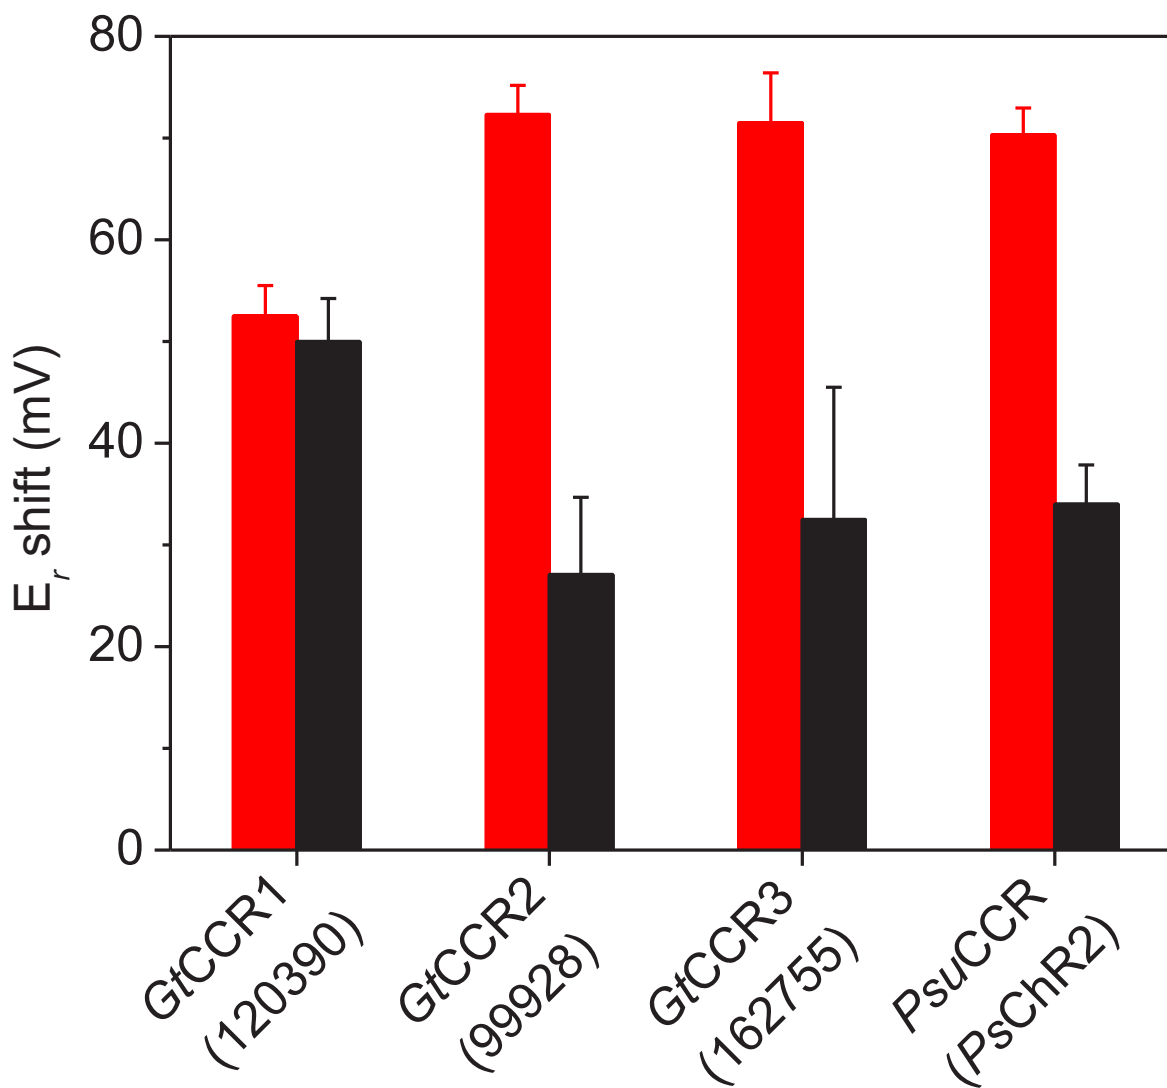

**Supporting figure 4.** The shifts of  $E_r$  upon a 100-fold reduction of the  $\text{Na}^+$  (from 150 mM to 1.5 mM; red bars) or  $\text{H}^+$  (from pH 5.4 to pH 7.4; black bars) concentration in the bath determined for cryptophyte CCRs by measuring the IE curves as shown in Fig. 3 c in the main text. The data points are the mean values  $\pm$  SEM ( $n = 3-5$  cells).



## Supporting References

1. Huson, D. H., C. Scornavacca. 2012. Dendroscope 3: an interactive tool for rooted phylogenetic trees and networks. *Syst. Biol.* 61:1061-1067.
2. Zhang, H., S. Gao, ..., W. H. Chen. 2012. EvolView, an online tool for visualizing, annotating and managing phylogenetic trees. *Nucleic Acids Res.* 40:W569-572.
